# Supplementary material
Source: ML conference proceedings conference paper supplement (https://openreview.net/forum?id=bzVsk7bnGdh)
Supplement: supplementary_material [file attachment]

## A CODE FOR TORCHDIFFEQ

Here we discuss in more detail the code used for `torchdiffeq`, that was introduced in Section 2.3.

By default, `torchdiffeq` uses a (slightly odd) mixed  $L^\infty$ -RMS norm. Given the adjoint state  $[a_t, z, a_z, a_\theta]$ , then the norm used is

$$\|[a_t, z, a_z, a_\theta]\| = \max\{\|a_t\|_{\text{RMS}}, \|z\|_{\text{RMS}}, \|a_z\|_{\text{RMS}}, \|a_\theta\|_{\text{RMS}}\},$$

where for  $x = (x_1, \dots, x_n)$ ,

$$\|x\|_{\text{RMS}} = \sqrt{\frac{1}{n} \sum_{i=1}^n x_i^2}.$$

Respecting this convention, the code provided reduces this to the seminorm

$$\|[a_t, z, a_z, a_\theta]\| = \max\{\|z\|_{\text{RMS}}, \|a_z\|_{\text{RMS}}\}.$$

Other similar approaches such as pure-RMS over  $[z, a_z]$  should be admissible as well.

## B EXPERIMENTAL DETAILS

### B.1 NEURAL CONTROLLED DIFFERENTIAL EQUATIONS

We use the same setup and hyperparameters as in Kidger et al. (2020). The loss function is cross entropy. The optimiser used was Adam (Kingma & Ba, 2015), with learning rate  $1.6 \times 10^{-3}$ , batch size of 1024, and 0.01-weighted  $L^2$  weight regularisation, trained for 200 epochs. The number of hidden channels (the size of  $z$ ) is 90, and  $f$  is parameterised as a feedforward network, of width 40 with 4 hidden layers, ReLU activation, and tanh final activation.

### B.2 CONTINUOUS NORMALISING FLOWS

We follow Grathwohl et al. (2019) and Finlay et al. (2020). The loss function is the negative log likelihood  $-\log(p(z(T) = x))$  of equation (6). The optimiser used was Adam, with learning rate  $10^{-3}$  and batch size 256, trained for 100 epochs. Relative and absolute tolerance of the solver are both taken to be  $10^{-5}$ . We used a multi-scale architecture as in Grathwohl et al. (2019) and Finlay et al. (2020), with 4 blocks of CNFs at 3 different scales.

### B.3 SYMPLECTIC ODE-NET

The optimiser used was Adam, with learning rate  $10^{-3}$ , batch size of 256, and 0.01-weighted  $L^2$  weight regularisation. Relative and absolute tolerance of the solver are both taken to be  $10^{-4}$ . We use the same architecture as in Zhong et al. (2020): this involves parameterising  $H$  as a sum of kinetic and potential energy terms. These details of Symplectic ODE-Net are a little involved, and we refer the reader to Zhong et al. (2020) for full details.
